# Supplementary material
Source: Springer Nature journal article supplement (https://www.springermedizin.de/resource/supplementary/12904_2008_52_MOESM2_ESM.pdf/9518016)
Supplement: MOESM2 [file 9518016]

Table 2: Frequencies of the indicators of palliative care, overall, per type of LTC and according to the presence of a diagnosis of cancer

| INDICATORS               | TOTAL |      |        |      |           |        | NH    |      |        |      |           |        | HHS   |      |        |      |           |        |
|--------------------------|-------|------|--------|------|-----------|--------|-------|------|--------|------|-----------|--------|-------|------|--------|------|-----------|--------|
|                          | Total |      | Cancer |      | No cancer |        | Total |      | Cancer |      | No cancer |        | Total |      | Cancer |      | No cancer |        |
|                          | N     | %    | N      | %    | N         | %      | N     | %    | N      | %    | N         | %      | N     | %    | N      | %    | N         | %      |
| <b>SPCS</b>              |       |      |        |      |           |        |       |      |        |      |           |        |       |      |        |      |           |        |
| Late care                | 64    | 7.4  | 40     | 21.3 | 24        | 3.6**  | 18    | 3.2  | 6      | 7.0  | 12        | 2.5*   | 46    | 16.1 | 34     | 33.3 | 12        | 6.3**  |
| Early care               | 99    | 10.4 | 73     | 29.8 | 26        | 3.7**  | 38    | 6.5  | 20     | 23.0 | 18        | 3.8**  | 61    | 15.3 | 53     | 33.5 | 8         | 3.5**  |
| <b>Opiates</b>           |       |      |        |      |           |        |       |      |        |      |           |        |       |      |        |      |           |        |
| Late care                | 458   | 53.3 | 129    | 69.4 | 329       | 48.9** | 369   | 63.9 | 65     | 74.7 | 304       | 62.8*  | 89    | 32.1 | 64     | 64.7 | 25        | 13.2** |
| Early care               | 248   | 26.3 | 121    | 50.0 | 127       | 18.1** | 146   | 26.3 | 39     | 44.8 | 107       | 22.9** | 102   | 26.3 | 82     | 52.9 | 20        | 8.6**  |
| <b>Pain scale</b>        |       |      |        |      |           |        |       |      |        |      |           |        |       |      |        |      |           |        |
| Late care                | 139   | 16.3 | 58     | 31.5 | 81        | 12.1** | 105   | 18.5 | 31     | 36.1 | 74        | 15.3** | 34    | 11.9 | 27     | 27.6 | 7         | 3.7**  |
| Early care               | 109   | 11.6 | 49     | 21.4 | 60        | 8.5**  | 73    | 13.0 | 22     | 25.9 | 51        | 10.7** | 36    | 9.6  | 27     | 18.8 | 9         | 3.9**  |
| <b>Any symptom scale</b> |       |      |        |      |           |        |       |      |        |      |           |        |       |      |        |      |           |        |
| Late care                | 96    | 11.3 | 37     | 20.4 | 59        | 8.8**  | 61    | 10.8 | 16     | 18.6 | 45        | 9.4*   | 35    | 12.4 | 21     | 22.1 | 14        | 7.5**  |
| Early care               | 77    | 8.3  | 32     | 14.1 | 45        | 6.4**  | 43    | 7.7  | 12     | 14.3 | 31        | 6.5*   | 34    | 9.1  | 20     | 14.0 | 14        | 6.1*   |

\*= <0.05, \*\* = <0.001

°=nursing homes

°°=home health services
